# Supplementary material
Source: Springer Nature journal article supplement (https://www.springermedizin.de/resource/supplementary/12880_2014_230_MOESM1_ESM.pdf/9450282)
Supplement: MOESM1 [file 9450282]

RFA/MWA of CRLM or  
LSR after prior RFA/MWA of CRLM

Inclusion criteria

- Documentation of primary CRLM
- Radiologic or histologic proof of CRLM
- Age  $\geq$  18 years
- eGFR > 60 or ability for pre- and post hydration

Exclusion criteria

- Chemotherapy  $\leq$  6 weeks before scanning
- Pregnancy
- Allergy to contrast media
- Resection of target lesion during follow-up
- General MRI-exclusion criteria

In the first year after initial RFA/MWA, 3  
monthly:

- ceCT liver
- PET-CT
- PET-MRI liver

No indication of recurrent disease on  
PET-CT / ceCT

Continue 3-monthly PET-MRI / PET-CT / ceCT  
until 1 year after initial RFA/MWA  
Questionnaire after 12 months

Recurrent disease on PET-CT / ceCT

Evaluation further treatment

Indication for RFA/MWA liver:

Biopsy and treatment  
Continue 3-monthly PET-MRI / PET-CT / ceCT  
until 1 year after initial RFA/MWA

Equivocal result PET-CT / ceCT

Repeat PET-MRI / PET-CT / ceCT after 3  
months

Chemotherapy or resection target lesion:  
Exclusion
